# Supplementary material
Source: PubMed Central journal article supplement (PMC4035235)

|      |                                                                   |     |
|------|-------------------------------------------------------------------|-----|
| VT4  | MRLGGGGSPRAAGPPGNGSRWRGAAEDGSSPPEAWSGAPNGSAGDWDPFGRDEELAKL        | 60  |
| 1U19 | --MNGTEGPNFYVFFSNKIGVVRSPFELPQYYLAEFWQFS-----MLAAY                | 43  |
|      | :.* * . . . . * . . * . . * . . . . *                             | **  |
| VT4  | EIAVLAVTFAVAVLGNGLVLLALRRTPRKASRMHLFIRHLSLADLVVAFFQVLPQLCWEV      | 120 |
| 1U19 | MFLIMLGFPINFLT----LYVIVQHKKLRTPINNYILLNAVADLFWVFGGPTTILYTSL       | 99  |
|      | : : : * . . * * . . : : : : : : : : * : * : * . . * . . . :       |     |
| VT4  | THRFBGFDGLCRVVKHLQVFGMFASAYMLVAMTADRYIAVCHPLKTLQQPTKRSYAMIAA      | 180 |
| 1U19 | HGYFVFGPTGCNLEGFATLGGELALWSLVVLAIERVYVVKFMSNFRFGFNHAIMGVAF        | 159 |
|      | * * . . . : . * : : * . : : * : * : * : * : . . . . : : : * :     |     |
| VT4  | AWALSLLSTPQYFIFSLSEVERGSRVYDCNAHFIMFWGPR---AYIITWITGGIFVAPVL      | 237 |
| 1U19 | TWMALACAAPPLVGSRYIEG--MQCSCGIDYYTPHEETNNEFVIYMFVWFIIPLI           | 217 |
|      | : * : * : * : * * : * : * : * : * : * : * : * : * : * : * : * : * |     |
| VT4  | LLATCYGFCFRINRSARGRRPGEAAGGPRRGLLLAPCVSGVVTISRAKIRIVKMTFV         | 297 |
| 1U19 | VIFPCYQGLVFTVWEAAAQQQES-----ATTQKAEKEVIRMVII                      | 256 |
|      | : : * * * : * : . : * : . . . . * : * : * : * : . . . . * : :     |     |
| VT4  | IVSAYVVCWAPFFIIQMSVNDQHFPVDSSENTIAITVIALLASLNSCCNFWIYMFSSGHL      | 357 |
| 1U19 | MVIAFLICWLPYAGVAFYIFTHQGS---DFGPIMTIPAFFAKTSAVYNPVIYIMMNI-KQ      | 312 |
|      | : * * : * * * : : : . . * * * * * : * : * : * : * : * : * : * : * |     |
| VT4  | LQDCVQSFPCCKIKQTLKEDSNSNSRRQISFTNNRSPTHSLNFWRESPHSKSISFIPV        | 417 |
| 1U19 | FRNCMVITLCCG--KNPLGDDEASTVSKTETSQVAPA-----                        | 348 |
|      | : : * : * * * . . . . . . . . : : : : :                           |     |
| VT4  | PT 419                                                            |     |
| 1U19 | --                                                                |     |

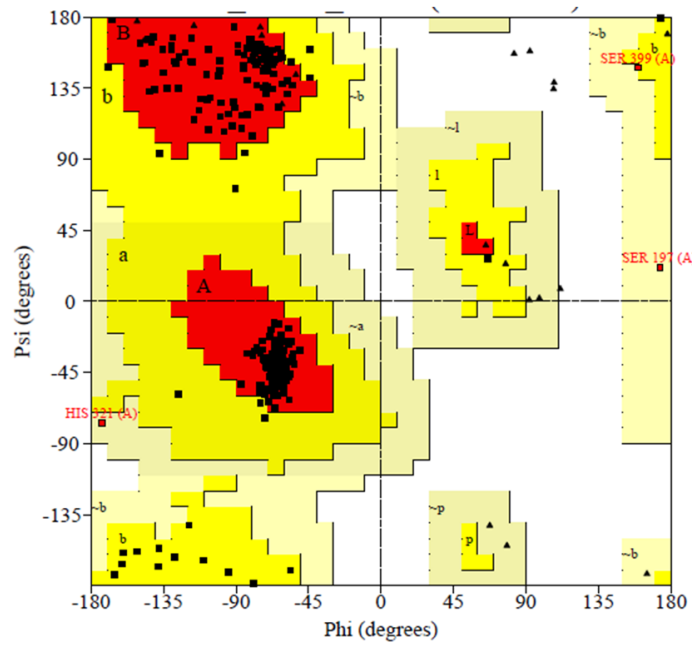

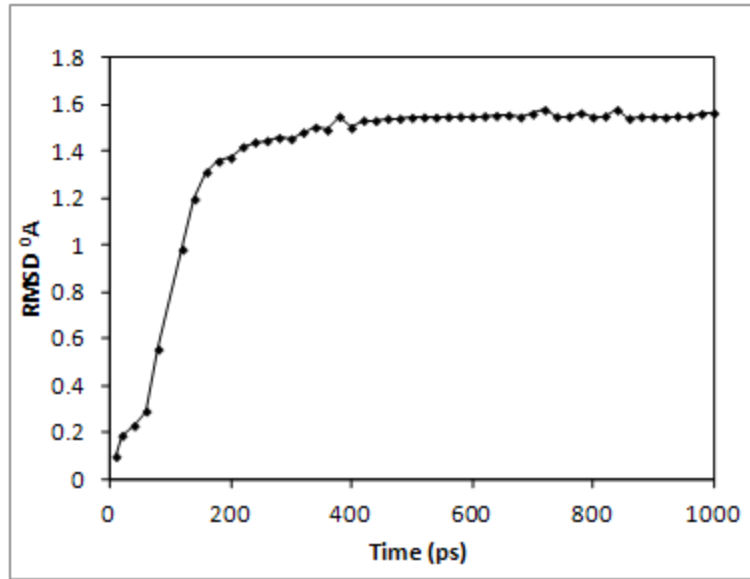

Supplement: NIHMS581015-supplement-Supplementary_Figures.pdf [file NIHMS581015-supplement-Supplementary_Figures.pdf]
